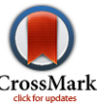

## Correction

# Correction: Analysis of Lipid Experiments (ALEX): A Software Framework for Analysis of High-Resolution Shotgun Lipidomics Data

The *PLOS ONE* Staff

## Notice of Republication

This article was republished on April 2, 2014, to replace an incorrectly published version. Please download this article again to view the correct version.

## Reference

1. Husen P, Tarasov K, Katafiasz M, Sokol E, Vogt J, et al. (2013) Analysis of Lipid Experiments (ALEX): A Software Framework for Analysis of High-Resolution Shotgun Lipidomics Data. *PLoS ONE* 8(11): e79736. doi:10.1371/journal.pone.0079736

---

**Citation:** The *PLOS ONE* Staff (2014) Correction: Analysis of Lipid Experiments (ALEX): A Software Framework for Analysis of High-Resolution Shotgun Lipidomics Data. *PLoS ONE* 9(4): e93351. doi:10.1371/journal.pone.0093351

**Published:** April 2, 2014

**Copyright:** © 2014 The *PLOS ONE* Staff. This is an open-access article distributed under the terms of the Creative Commons Attribution License, which permits unrestricted use, distribution, and reproduction in any medium, provided the original author and source are credited.
